# Supplementary material
Source: PubMed Central journal article supplement (PMC3215061)
Supplement: 1109510108_pnas.1109510108_SI.pdf [file 1109510108_pnas.1109510108_SI.pdf]

# Supporting Information

Trouillard et al. 10.1073/pnas.1109510108

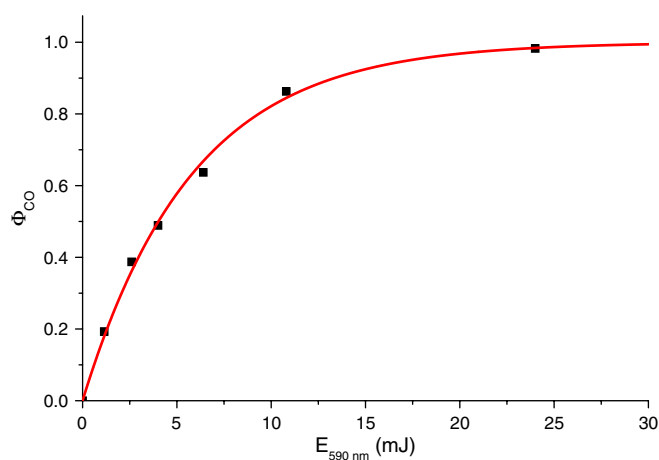

Fig. S1 Plot of the relative amount of photodissociated CO from heme  $a_3$  of CcOx, as monitored by the intensity of the absorption increase at 445 nm 10  $\mu\text{s}$  after the flash, against the flash intensity (black squares). The experimental data were fitted with an exponential function (red solid line).

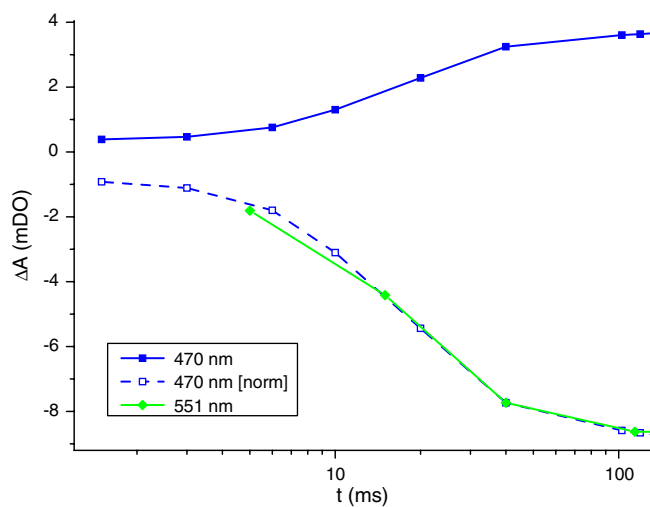

Fig. S2. Kinetics of cytochrome  $c$  oxidation under cytochrome  $bc_1$  inhibited conditions [by Tri-Decyl Stigmatellin (TDS)], at 470 nm (blue solid line), 551 nm (green solid line), and 470 nm, normalized to show the kinetic equivalence with the 551 nm trace (blue dashed line);  $[\text{O}_2] \sim 2.6 \mu\text{M}$ .

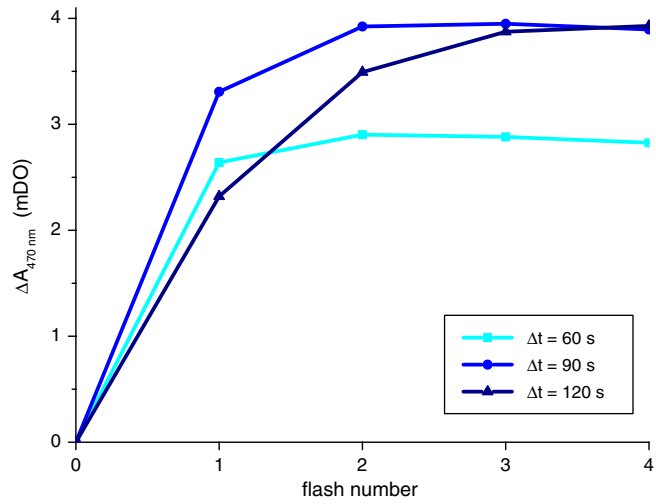

**Fig. 53** Progressive oxidation of cytochrome *c* in response to a series of flashes, monitored from the absorption increase at 470 nm. The darker the color the lower the oxygen concentration.

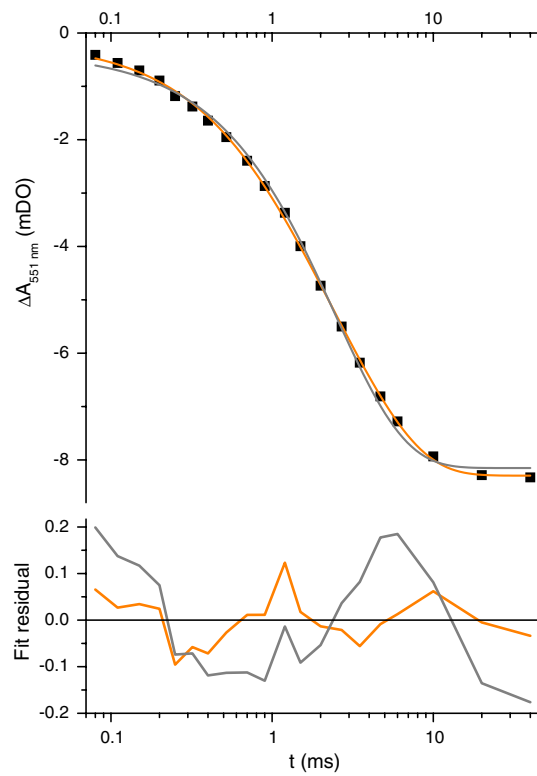

**Fig. 54** Kinetics at  $[O_2] = 156 \mu\text{M}$  of cytochrome *c* oxidation in the W303  $\Delta\text{crd}1$  mutant strain, with monoexponential (gray line) and biexponential fits (orange line) of the data, with the corresponding residuals shown below.

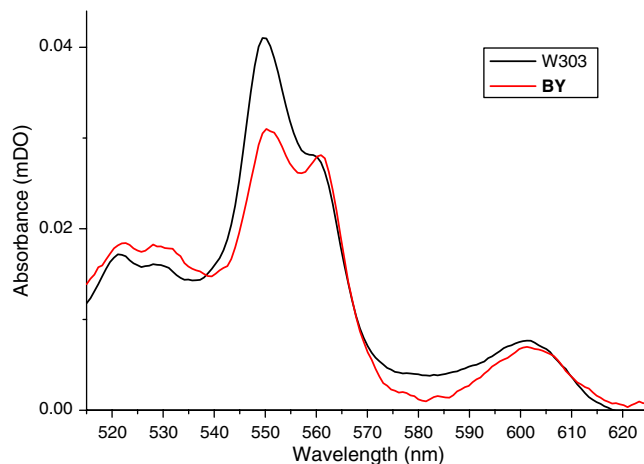

**Fig. 55.** Absolute spectra of anaerobic suspensions of W303 (black line) and BY (red line) whole cells. Spectra were arbitrarily corrected for scattering and normalized to the amplitude of CcOx.

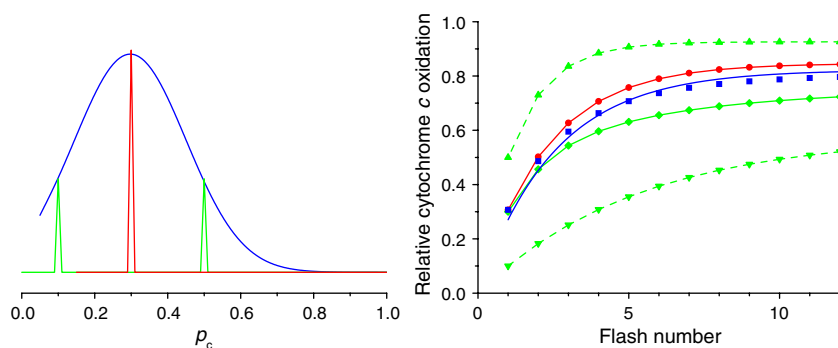

**Fig. 56** (Left): Schematic representation of narrow distributions of  $p_c$ , at the average value  $p_c = 0.3$  (red curve), or at two separate values of  $p_c = 0.1$  and  $p_c = 0.5$  (down and up triangles respectively), the solid green curve (diamonds) displays the average of these two cases. An intermediate situation, showing a Gaussian distribution of  $p_c$  centered at  $p_c = 0.3$ , is also shown (blue curve). (Right): Simulation of the progressive oxidation of cytochrome *c* upon a series of flashes following a geometrical probability law with parameters corresponding to the different cases depicted in (A) with the same color codes. The dashed green lines represent the sequential oxidation of cytochrome *c* in the cases  $p_c = 0.1$  (down triangles) and  $p_c = 0.5$ , while the solid green line stands for the average of these two cases. The blue line is a fit of the Gaussian distribution with a single geometrical law, including  $\alpha: \chi(n) = \sum_{k=0}^{n-1} p_c [(1-\alpha)(1-p_c)]^k$ . Notably, the quality of the fit of the simulated data is worse than that of the experimental data (see Fig. 5 or Fig. S7) thus showing that if a Gaussian were to be considered, its width would be narrower than in the case illustrated here. To illustrate the fact that the geometrical profile of sequential oxidation of cytochrome *c* by CcOx demonstrates its ability to freely diffuse, we simulated the consequences of various situations. We suppose that any diffusion-constraining compartment, whether supercomplex or membrane domain, will allow unconstrained diffusion of cytochrome *c* within its own boundaries, and that oxidation of cytochrome *c* will follow a geometrical law in each compartment. The restriction to diffusion is expected to translate into a distribution of  $p_c$  values, at a given laser intensity and oxygen concentration. In contrast, free diffusion of cytochrome *c* will result in a single, average value of  $p_c$ . We hereby chose to use an average value of  $p_c$  of 0.3, meaning that 30% of the cytochrome *c* are oxidized on a single flash, if its diffusion is homogeneous. On the other hand, we compare an extreme case with two compartments being respectively characterized by  $p_c = 0.1$  and  $p_c = 0.5$  (thus keeping the average  $p_c$  equal to 0.3). As a more realistic model, we consider the case of a Gaussian distribution for  $p_c$ , again with an average value of  $p_c = 0.3$  (left). The consequences of such distributions among compartments on the probability of cytochrome *c* oxidation can be seen in the figure on the right, where the inhomogeneous models always deviate from the plots of the geometrical progressions.

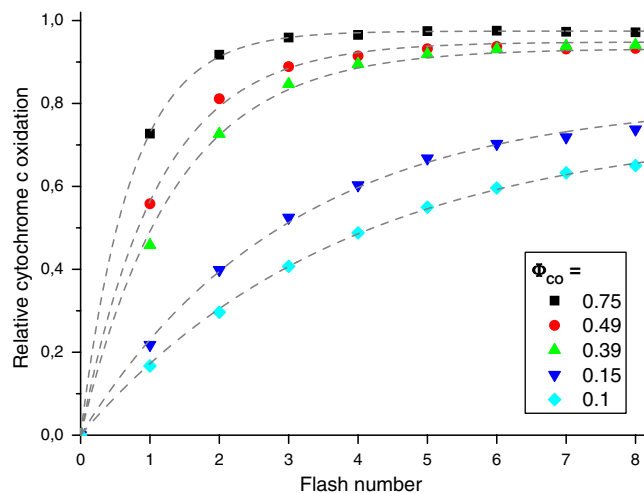

**Fig. S7** Relative amount of cytochrome c oxidized on a series of flashes at different laser intensities ( $\Phi_{CO}$ ), monitored at 551 nm, in the W303  $\Delta atp20$  mutant strain. The data processing and legends are the same as for the wild-type strain, displayed in Fig. 5.

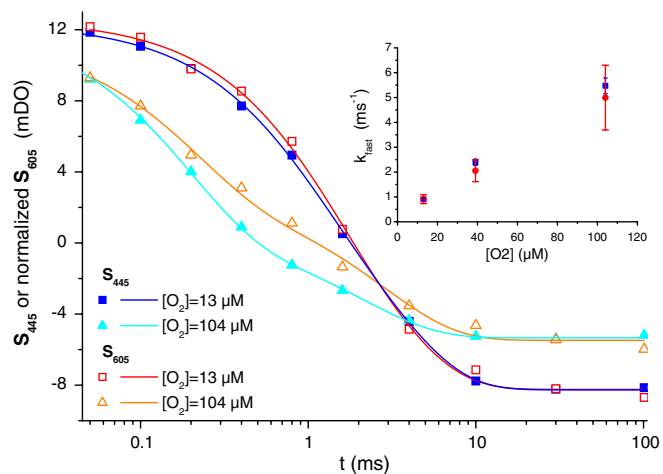

**Fig. S8** Kinetics of CcOx oxidation in the W303 strain, monitored at 445 nm and 605 nm, and deconvoluted as described in *Material and Methods* see main text. Data were fitted with biexponential functions (solid lines). The  $S_{605}$  curves were arbitrarily normalized by a constant factor in order to match the  $S_{445}$  curves. *Inset*: Plot of the rate constant of the fast phase against  $O_2$  concentration, for the  $S_{445}$  (blue symbols) and  $S_{605}$  traces.
